# Supplementary material for: Norcantharidin Sensitizes Colorectal Cancer Cells to Radiotherapy via Reactive Oxygen Species–DRP1-Mediated Mitochondrial Damage
Source: MDPI journal article supplement (doi:10.3390/antiox13030347), 2024-03-14
Supplement: s1 [file s1]

**Table S1: shRNA and main primer sequences**

| Oligo name                          |                |     |
|-------------------------------------|----------------|-----|
| Mfn-1 F:<br>GTGGCAAACAAAGTTTCATGTG  | Sangon Biotech | N/A |
| Mfn-1 R:<br>CACTAAGGCGTTTACTTCATCG  | Sangon Biotech | N/A |
| Mfn-2 F:<br>GTGCTTCTCCCTCAACTATGAC  | Sangon Biotech | N/A |
| Mfn-2 R:<br>ATCCGAGAGAGAAATGGAATC   | Sangon Biotech | N/A |
| Opa-1 F:<br>TCTGCACACTCAGTTGAAGTAT  | Sangon Biotech | N/A |
| Opa-1 R:<br>GCCTTTGTCATCTTTCTGCAAT  | Sangon Biotech | N/A |
| Drp-1 F:<br>GAGATGGTGTTC AAGAACCAAC | Sangon Biotech | N/A |
| Drp-1 R:<br>GAGATGGTGTTC AAGAACCAAC | Sangon Biotech | N/A |
| Fis-1 F:<br>GGAGGAACAGCGGGATTACG    | Sangon Biotech | N/A |
| Fis-1 R:<br>ATGGCCTTGTC AATGAGCCG   | Sangon Biotech | N/A |
| Mff F:<br>AACCCCTGGCACTGAAAACA      | Sangon Biotech | N/A |
| Mff R:<br>AGTCTGCCAACTGCTCGGAT      | Sangon Biotech | N/A |
| GAPDH R:<br>GGTTGTCTCCTGCGACTTCA    | Sangon Biotech | N/A |
| GAPDH F:<br>GGTCCAGGGTTTCTTACTCC    | Sangon Biotech | N/A |

**Table S2: List of primary antibodies and their sources**

| <b>Antibodies</b> | <b>Source (item number)</b> | <b>WB</b> |
|-------------------|-----------------------------|-----------|
| Bax               | CST 41162                   | 1:1000    |
| Bcl-xL            | CST 2764                    | 1:1000    |
| Bim               | CST 2933                    | 1:1000    |
| Cleaved-caspase3  | CST 9664                    | 1:1000    |
| Survivin          | CST 2808                    | 1:1000    |
| Cytochrome C      | CST 11940                   | 1:1000    |
| CyclinB1          | CST 12231                   | 1:1000    |
| p-Chk2            | CST 82263                   | 1:1000    |
| p-CDC2            | CST 4539                    | 1:1000    |
| CHK2              | Afinity 6033                | 1:1000    |
| CDC2              | Afinity 6108                | 1:1000    |
| $\gamma$ -H2Ax    | CST 7631                    | 1:1000    |
| GAPDH             | CST 5174                    | 1:5000    |
| P21               | CST 2947                    | 1:1000    |
| P16               | CST 80772                   | 1:1000    |
| Mitofusin-2       | CST 11925                   | 1:1000    |
| DRP1              | CST 8570                    | 1:1000    |

|             |           |        |
|-------------|-----------|--------|
| p-DRP1      | CST 3455  | 1:1000 |
| Mitofusin-1 | CST 14739 | 1:1000 |
| OPA1        | CST 67589 | 1:1000 |
| MFF         | CST 84580 | 1:1000 |

---
