# Supplementary figures and images for: Norcantharidin Sensitizes Colorectal Cancer Cells to Radiotherapy via Reactive Oxygen Species–DRP1-Mediated Mitochondrial Damage
Source: MDPI journal article supplement (doi:10.3390/antiox13030347), 2024-03-14

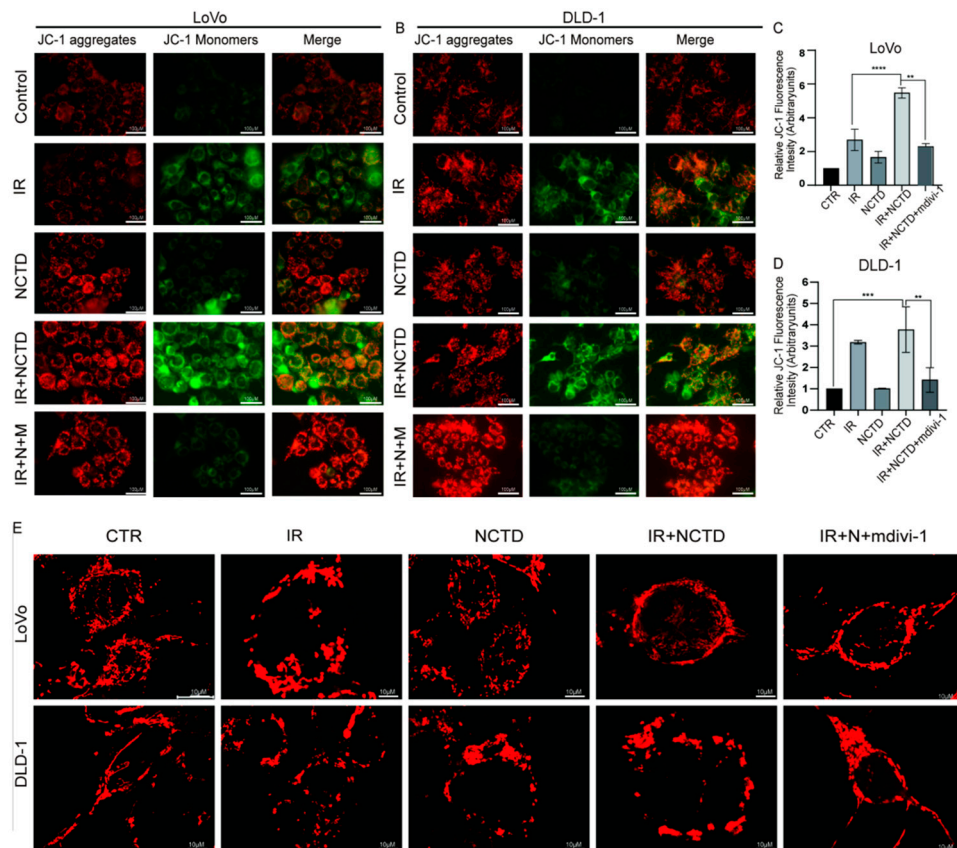

Supplement: s1 [file s1]
